# Supplementary material for: Coupling of gelation and glass transition in a biphasic colloidal mixture—from gel-to-defective gel-to-glass
Source: Royal Society of Chemistry journal article supplement (doi:10.1039/c5sm01531f), 2015-01-01
Supplement: c5sm01531f1.pdf [file c5sm01531f1.pdf]

## Supporting Information

### Coupling of gelation and glass transition in a biphasic colloidal mixture

—from gel-to-defective gel-to-glass

Di Jia,<sup>1,2</sup> Javoris V. Hollingsworth,<sup>1</sup> Zhi Zhou,<sup>1,2</sup> He Cheng<sup>3,4,\*</sup> and Charles C. Han<sup>1,\*</sup>

#### 1. Supplementary Video Files S1 and S2.

**Video title:** biphasic mixture formation process

Binary gel formation process (sample CS94) and biphasic mixture formation process (sample CS60) are observed by confocal microscopy at 35 °C and their final morphologies exhibit in the main text (Fig. 8).

**S1:** video of binary gel formation process of sample CS94 with  $\Phi_{\text{total}}=0.1$  and its final morphology is in the main text (sample named “CS94” in Fig. 8)

**S2:** video of biphasic mixture formation process of sample CS60 with  $\Phi_{\text{total}}=0.1$  and its final morphology is in the main text (sample named “CS60” in Fig. 8)

**Keywords of the video:** binary gel formation process; network; cluster

#### 2. Dynamic strain sweeps in the glassy state

In order to support the conclusion that when  $\Phi_{\text{PSS}}$  is below 50% ( $\Phi_{\text{total}}=32\%$  is fixed), the system goes into glassy state, dynamic strain sweeps for sample CS50, CS25 and CS0 were studied.

As shown in Fig. 1s, all the three samples show characteristics of glass:  $G'$  is

almost independent of frequency and  $G''$  shows a minimum, which indicates the characteristic time for a particle to explore its cage. When  $\Phi_{\text{PSS}}$  increases from CS50 to CS0, the  $G'$  values continue increasing. Besides, the minimum of  $G''$  moves to higher frequencies as  $\Phi_{\text{PSS}}$  increases, which indicates smaller cages and larger real volume fractions. These results reconfirm the conclusion that the real volume fraction increases as  $\Phi_{\text{PSS}}$  increases ( $\Phi_{\text{total}}$  is fixed).

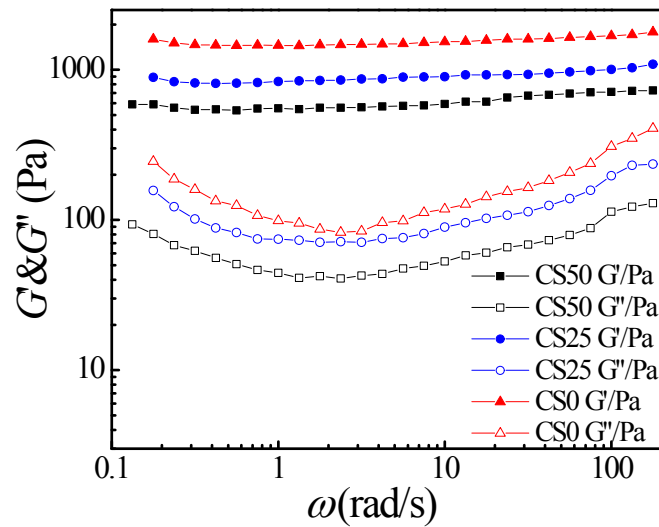

Fig. 1s Dynamic frequency sweeps for sample CS50 (black), CS25 (blue), CS0 (red), respectively at 35 °C,  $\gamma=1\%$ . Closed (open) symbols represent storage (loss) moduli.

### 3. Preshear procedure

First, the sample was presheared at 25°C, the preshear ( $\gamma=1\%$ ,  $\omega=1$  rad/s) was used to make the sample uniform for 180s. Then, the temperature was increased to 35°C and equilibrium for 10 min. Finally, another preshear ( $\gamma=1\%$ ,  $\omega=1$  rad/s) was conducted until the modulus was independent of time.

### 4. Frequency dependence of yielding behavior

The dynamic strain sweeps at different frequencies for sample CS84 and CS75 are shown in Fig. 2s. For CS84 and CS75, with increasing frequency both  $G'$  and  $G''$  increase slightly in the linear regime. For CS84, two-step yielding behavior still exists at different frequencies and the yield strains seem to remain unchanged. For CS75, with increasing frequency, both  $G'$ ,  $G''$  and the yield strain increase slightly, but there is still one-step yielding at different frequencies. Therefore, there seems to be no transition between two-step yielding and one-step yielding at different frequencies in this system.

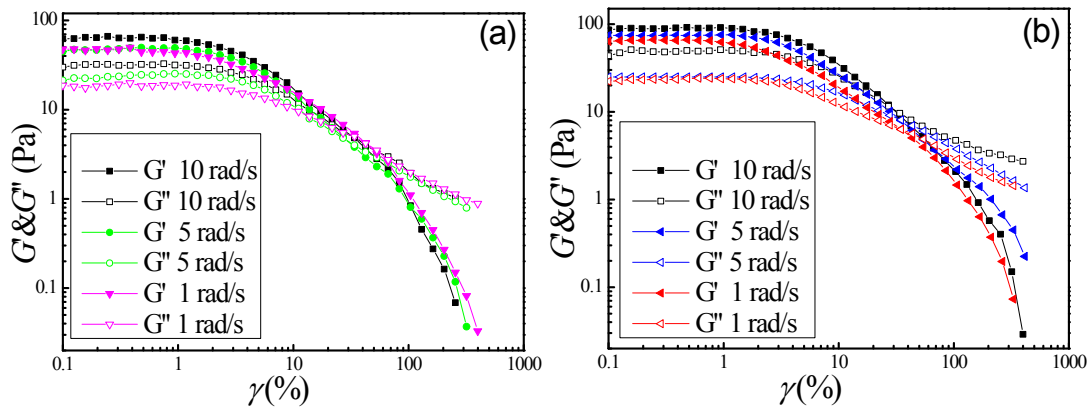

Fig. 2s Dynamic strain sweeps at different frequencies for CS84 (a) and CS75 (b) at 35°C. The closed symbols represent  $G'$  and open symbols represent  $G''$ .
